# Supplementary material for: Characteristics of Aerosol and Effect of Aerosol-Radiation-Feedback in Handan, an Industrialized and Polluted City in China in Haze Episodes
Source: MDPI journal article supplement (doi:10.3390/atmos12060670), 2021-05-24
Supplement: s1 [file s1]

Archive with 2 entries (2 files):
- date.xlsx
- Re01-Supplementary Information.pdf
