# Supplementary material for: Characteristics of Aerosol and Effect of Aerosol-Radiation-Feedback in Handan, an Industrialized and Polluted City in China in Haze Episodes
Source: MDPI journal article supplement (doi:10.3390/atmos12060670), 2021-05-24
Supplement: s1 [file s1 › date.xlsx]

## Sheet: Sheet1
	Windspeed(m/s)-observation	Windspeed(m/s)-simulation	Vis(km)-observation	Vis(km)-simulation	T(K)-observation	T(K)-simulation	RH(%)-observation	RH(%)-simulation	PBLH(m)-observation	PBLH(m)-simulation	PM2.5(ug/m3)-observation	PM2.5(ug/m3)-simulation
20171001	2.66667	4.03133	6.03333	5.16494	280.438	276.543	0.87773	0.60753	732.255	135.566	80	74.6363
20171002	2.33333	2.85988	5.36667	2.63479	280.867	278.522	0.6964	0.72354	729.776	477.599	73	6.66834
20171003	1	1.10868	11	5.11064	276.765	274.444	0.80053	1	957.635	1131.1	33	14.6649
20171004	2	1.39124	16.3333	10.4301	283.092	281.885	0.65319	0.47582	1259.64	1801.99	32	12.3478
20171005	3.33333	3.20236	15.3333	5.88759	283.14	281.696	0.72853	0.6172	965.993	1483.3	32	27.7789
20171006	1.66667	1.95825	6.76667	1.47639	290.02	289.67	0.61911	0.3648	1054.03	1303.42	57	4.62068
20171007	1	1.11927	3.13333	0.9509	284.007	282.746	0.81031	0.60242	642.212	620.065	77	52.6359
20171008	1.33333	1.39599	3.06667	1.61672	281.619	279.711	0.84307	1	437.176	443.861	67	4.79833
20171009	2.33333	1.11507	6.63333	1.02806	276.796	273.908	0.8444	0.9425	384.759	350.812	30	6.21695
20171010	3.33333	3.29902	9	3.06477	276.646	274.87	0.88334	1	412.633	574.504	25	18.5599
20171011	1	1.30528	14	6.81245	284.249	283.661	0.78575	0.30896	757.577	1066.2	40	54.2141
20171012	2.66667	2.38776	8	4.8076	282.884	281.401	0.72699	0.89636	1001.57	735.418	50	7.22182
20171013	2	1.75661	3.36667	0.42198	288.916	289.166	0.69225	1	848.517	1210.27	94	54.331
20171014	0.66667	0.39127	4.7	4.83656	286.141	285.655	0.7526	0.53121	755.496	970.553	74	16.8954
20171015	1.66667	2.37238	2.46667	1.49956	279.712	277.836	0.63375	0.69522	567.169	1268.01	133	97.3293
20171016	1	1.08522	1.7	1.14439	287.708	287.898	0.75952	0.37008	548.282	688.734	162	103.82
20171017	0	0	0.6	0.37527	281.764	280.668	0.92878	0.34802	362.098	170.245	144	124.408
20171018	1.33333	1.19875	2.15	0.60081	280.448	278.69	0.67572	0.83875	658.419	707.474	68	32.6881
20171019	1	0.96349	2	0.45807	281.412	279.577	0.7659	1	895.79	742.528	92	92.2877
20171020	1.66667	1.2771	3.6	0.8843	277.393	274.138	0.68278	1	891.656	846.34	101	86.6379
20171021	1.66667	2.30502	3.66667	2.4232	286.246	284.92	0.77729	1	588.919	731.009	128	100.032
20171022	2	2.64401	4.7	5.17919	276.343	273.528	0.88433	0.89432	786.847	729.687	87	2.34337
20171023	1.33333	1.50368	14	0.08321	276.559	274.178	0.56742	0.44854	1385.37	2621.48	44	27.5747
20171024	1.66667	2.71216	6.33333	4.37108	288.571	288.868	0.6065	0.89057	1326.79	1899.82	69	33.7463
20171025	0.5	0.31608	3.8	3.29094	290.58	291.424	0.6204	1	895.512	918.143	131	58.345
20171026	0.5	0.21686	3.1	2.20371	280.125	278.531	0.87632	0.93858	816.151	1288.2	113	26.0564
20171027	1.33333	1.07725	1.26667	0.78906	287.296	286.875	0.58321	0.44255	565.544	569.824	194	205.774
20171028	3.33333	4.11268	2.13333	0.24112	278.865	276.802	0.67469	0.80039	834.233	1186.07	160	145.905
20171029	1.33333	1.54754	21	10.7093	277.879	276.886	0.35621	0.3656	1511.46	1447.05	29	3.8629
20171030	2	1.11879	13.3333	1.17542	283.593	283.246	0.52931	0.52506	1261.68	1796.81	56	64.6124
20171031	2.5	3.90178	7.5	0.18384	282.902	282.565	0.32482	0.33729	871.898	1072.93	90	71.687
20171101	0.66667	0.68102	3.06667	3.95305	280.168	278.706	0.78173	0.84702	645.013	839.88	136	26.819
20171102	1	0.98895	2.6	0.89134	276.165	273.486	0.73807	1	698.9	735.181	184	177.742
20171103	2.33333	2.21111	13.3333	6.81485	283.415	282.923	0.5991	0.12615	1283.41	1665.6	68	0.47295
20171104	3.5	3.99692	15	4.91408	283.586	282.458	0.38105	0.26225	1438.12	2088.4	49	16.6956
20171105	3	2.35051	11.6667	6.58066	282.507	281.621	0.48031	0.1	1147.75	1206.33	61	27.3107
20171106	1.33333	1.8298	4	0.23452	288.586	289.436	0.70723	1	816.658	1497.98	120	86.3023
20171107	1	0.9606	5.46667	0.46333	278.351	275.935	0.61788	0.64802	895.023	1599.73	147	116.177
20171108	1.66667	1.66415	3.7	1.74332	282.303	281.35	0.57674	0.61912	819.623	595.916	147	15.4437
20171109	1	0.51254	5.15	4.82925	279.259	277.411	0.59934	0.26385	952.66	797.577	110	77.9936
20171110	2.66667	3.39516	21	2.1495	281.605	280.643	0.23325	0.2312	1549.04	1601.39	65	2.71877
20171111	2.33333	3.50171	16.6667	17.9471	275.704	274.192	0.4188	0.54785	1503.64	2141.91	43	27.5344
20171112	1.33333	1.87573	7.83333	3.63528	281.644	281.4	0.56604	0.40561	922.861	1221.4	72	12.9714
20171113	1	1.03129	6.95	2.07808	276.706	275.37	0.60974	0.30938	1318.93	2136.72	78	29.8598
20171114	1.66667	1.2138	17	0.02557	275.057	273.984	0.36955	0.31992	1483.6	1709.42	44	25.1155
20171115	0	0	6.45	0.38775	274.965	274.994	0.63673	0.48825	1249.77	2099.05	68	1.43072
20171116	1.33333	1.31077	7.33333	0.5115	276.077	275.475	0.51597	0.33313	1145	1308.63	85	36.8541
20171117	2.66667	2.17062	10.3333	0.31707	277.448	276.947	0.36936	0.35954	1035.67	1073.31	102	9.60544
20171118	1.66667	1.57258	13.6667	7.24676	273.524	273.234	0.22928	0.32587	1263.06	1968.82	46	3.84464
20171119	0	0	7	0.10137	272.249	272.274	0.57101	0.60474	798.992	145.732	92	99.9876
20171120	2.33333	2.04559	5	2.21911	277.947	277.738	0.52297	1	747.212	320.766	172	66.3595
20171121	1.66667	2.11142	5.1	2.98179	275.499	274.019	0.59062	0.73656	851.591	980.012	118	51.7754
20171122	1.33333	1.42941	18.6667	12.7679	278.979	278.711	0.25208	0.05515	1594.04	1903.27	38	14.5007
20171123	1	1.07523	9.5	10.8277	273.638	273.459	0.46451	0.48356	1533.19	2613.82	44	17.5081
20171124	2.66667	1.94795	17	5.50192	274.331	273.768	0.39242	0.51093	1272.2	777.67	46	11.121
20171125	2.66667	3.64953	11.6667	11.0697	278.585	277.793	0.34902	0.33514	995.704	774.326	78	66.4807
20171126	1	1.09437	16.5	9.97836	275.319	274.862	0.44892	0.69875	1106.29	814.727	94	38.1845
20171127	3.5	3.46518	6.5	3.89021	278.127	277.909	0.53435	0.29721	865.101	1014.9	107	61.1263
20171128	1.33333	1.33562	4.6	4.14033	276.665	276.178	0.51201	0.14886	649.714	640.774	158	104.476
20171129	1.66667	0.33585	14.3333	17.871	273.83	273.825	0.31215	0.54657	1012.01	993.541	41	10.6338
20171130	2	0.85158	10.3333	5.68968	272.689	272.816	0.39624	0.64811	1104.12	1270.23	77	7.88174
20180101	1.625	1.50199	5.4375	4.32871	273.391	273.283	0.405	0.3059	778.303	618.374	134	182.192
20180102	2.75	2.39748	5.4875	2.60171	273.201	273.192	0.60625	0.53234	794.607	1334.22	101	63.1645
20180103	1.125	1.03322	11.1125	6.37895	272.648	272.697	0.38625	0.37368	1069.66	760.401	62	48.3891
20180104	0.375	0.33981	11.125	6.13735	272.435	272.628	0.43375	0.61414	1096.25	1333.95	50	21.0261
20180105	1.375	1.44907	6.05	7.79929	272.826	272.923	0.63375	0.74851	936.697	986.787	88	130.261
20180106	0.5	0.49927	4.7125	2.14482	273.254	273.239	0.62875	0.84436	707.92	729.91	133	180.392
20180107	0.375	0.26042	2.675	1.66077	272.307	272.265	0.83625	0.78637	527.059	571.031	121	144.935
20180108	1.5	1.98205	17.875	4.83995	273.492	273.412	0.305	0.36015	1547.19	2764.26	52	53.4319
20180109	2	0.51113	17.625	8.03414	274.046	273.795	0.22875	0.25516	1481.45	1385.69	25	29.554
20180110	1	0.99566	16	10.3915	272.929	273.008	0.30625	0.25823	1352.16	1274.51	36	38.6506
20180111	1.125	0.65371	14.375	11.5426	271.595	272.25	0.26	0.31899	1398.59	1928.42	44	61.8293
20180112	2.28571	2.59954	9.57143	6.19473	272.61	272.914	0.35429	0.37305	789.596	566.665	78	114.598
20180113	2.375	2.3785	6.025	4.23498	273.198	273.157	0.59625	0.72039	561.317	102.037	109	145.694
20180114	0.625	0.43221	2.975	1.62326	273.559	273.474	0.6775	0.7461	500.833	726.296	198	284.639
20180115	0.875	0.99753	2.0875	1.50074	272.991	273.011	0.63625	0.43094	504.914	550.236	311	229.953
20180116	0.75	0.78981	3.75	1.77953	273.635	273.554	0.51	0.77649	697.592	1116.23	214	74.128
20180117	0.875	0.85035	3.0125	1.49504	274.079	274.064	0.505	0.40525	651.127	916.563	253	289
20180118	1	0.28659	3.2375	0.65467	274.27	274.134	0.5125	0.43002	540.086	878.594	212	157.429
20180119	0.875	0.70571	3.225	2.95573	276.484	276.183	0.46375	0.64334	702.123	316.173	250	260.228
20180120	0.625	0.71043	2.85	1.8419	273.758	273.348	0.5325	0.66593	531.25	868.845	264	126.437
20180121	2	2.54566	5.175	3.31634	272.51	272.534	0.68	0.61581	663.517	1054.61	128	180.549
20180122	2.375	1.50774	4.9125	2.36228	270.721	270.73	0.72375	0.83022	662.941	631.981	89	127.728
20180123	1.25	1.58974	9.125	5.194	272.222	273.147	0.6075	0.55491	1118.35	1376	54	28.2996
20180124	0.75	0.57346	7.0625	7.68767	270.253	270.656	0.45375	0.38999	1057.42	1642.87	88	39.949
20180125	1.25	1.44341	7.55	3.49463	270.577	270.949	0.37125	0.37387	1053.1	1021.71	95	83.8623
20180126	1.75	2.13957	11.75	8.71933	270.712	271.059	0.37625	0.2994	1465.61	2654.26	61	33.653
20180127	1.25	1.08588	5.775	0.18129	271.562	272.09	0.67375	0.77353	961.547	1265.54	93	104.059
20180128	1.5	1.04025	2.1125	0.91543	269.492	269.616	0.77375	0.71232	481.189	397.343	191	201.295
20180129	1	0.96143	9.125	2.60792	272.176	272.638	0.405	0.36327	978.48	1011.84	97	127.162
20180130	0.625	0.57119	7.3	0.55043	273.099	273.108	0.38125	0.3707	927.123	1103.31	111	123.727
20180131	0.875	0.84659	11.875	2.38873	273.65	273.491	0.27375	0.22448	1271.54	1475.15	64	64.9005
